only unuseful, as also suggested by the observational study of Komatsu *et al.*,<sup>1</sup> but are harmful to renal function,<sup>2-4</sup> and a detrimental effect on survival could not be excluded.<sup>4</sup> There is a compelling need for further large, high-quality, randomized placebo-controlled trials to confirm these findings and to assess the most appropriate time-point of statin discontinuation before cardiac surgery.

### Competing Interests

The authors declare no competing interests.

**Alessandro Putzu, M.D., Michele Gallo, M.D., Enrico Ferrari, M.D., Tiziano Cassina, M.D., Giovanni Landoni, M.D.** Fondazione Cardiocentro Ticino, Lugano, Switzerland (A.P.). alessandroputzu@gmail.com

### References

1. Komatsu R, Yilmaz HO, You J, Bashour CA, Rajan S, Soltesz EG, Sessler DI, Turan A: Lack of association between preoperative statin use and respiratory and neurologic complications after cardiac surgery. *ANESTHESIOLOGY* 2017; 126:799–809
2. Karkouti K, Wijeyesundera DN, Yau TM, Callum JL, Cheng DC, Crowther M, Dupuis JY, Fremes SE, Kent B, Laflamme C, Lamy A, Legare JF, Mazer CD, McCluskey SA, Rubens FD, Sawchuk C, Beattie WS: Acute kidney injury after cardiac surgery: Focus on modifiable risk factors. *Circulation* 2009; 119:495–502
3. Zheng Z, Jayaram R, Jiang L, Emberson J, Zhao Y, Li Q, Du J, Guarguagli S, Hill M, Chen Z, Collins R, Casadei B: Perioperative rosuvastatin in cardiac surgery. *N Engl J Med* 2016; 374:1744–53
4. Billings FT IV, Hendricks PA, Schildcrout JS, Shi Y, Petracek MR, Byrne JG, Brown NJ: High-dose perioperative atorvastatin and acute kidney injury following cardiac surgery: A randomized clinical trial. *JAMA* 2016; 315:877–88
5. Putzu A, Capelli B, Belletti A, Cassina T, Ferrari E, Gallo M, Casso G, Landoni G: Perioperative statin therapy in cardiac surgery: A meta-analysis of randomized controlled trials. *Crit Care* 2016; 20:395

(Accepted for publication November 30, 2017.)

## Neurocritical Care Needs Predictive Scores That Succeed at Predicting Failure as Well as They Predict Success

To the Editor:

In the August 2017 issue of *ANESTHESIOLOGY*, Asehnoune *et al.* report their derivation of a novel bedside scoring system to predict extubation success in the intubated brain-injured patient.<sup>1</sup> Many brain-injured patients are likely exposed to excess ventilated days because they do not meet extubation criteria originally established in general intensive care unit (ICU) populations.<sup>2</sup> Careful consideration is required, however, before routinely utilizing new extubation prognostication

scores. Although the VISAGE (visual pursuit, swallowing, age, Glasgow coma scale for extubation) score performs well at predicting extubation success based on favorable neurologic indicators, it does not adequately predict which patients will fail extubation due to neurologic dysfunction.

Recovery of arousal and airway protective reflexes after neurologic injury often is slow, and a subset of patients will benefit from early tracheostomy without an extubation attempt. The VISAGE score poorly discriminates extubation success among patients with low scores. Based on this model, a patient under 40 yr old without visual pursuit or swallowing efforts, and with a Glasgow coma scale less than 10, would have an almost 60% chance of extubation success. Barring a prediction of rapid neurologic improvement or barriers to safe reintubation, we believe that this individual should undergo a trial extubation. We are concerned that adoption of a scoring system with explicit or perceived cut-points would lead to such patients remaining intubated longer than necessary. A similar problem arises from the predictive score introduced in *ANESTHESIOLOGY* earlier this year by Godet *et al.*<sup>3</sup> Although their regression-based score has a clear inflection point, fully one third of patients below this score were successfully extubated. At the suggested cut-point, their score falls short of the degree of negative predictive value originally reported for the Rapid Shallow Breathing Index (RSBI) in a general ICU population.<sup>4</sup> The negative predictive value for the VISAGE score at a cut-point of 3 performs even worse.

Timely extubation of all ICU patients, including those with brain injury, helps prevent ventilator-associated complications. Although our colleagues highlight that brain-injured patients can be safely extubated, we caution against rigorously applying these scores due to the possibility of excess mechanical ventilation for patients who score poorly. Extubation failure and reintubation is certainly not without risk and is predictive of worse outcomes, though causality has not been established.<sup>1,5</sup> Further development of scoring models with improved negative predictive values is needed to identify patients who should truly forgo trial extubation. Until these risks are further quantified, and such a tool is developed, the neurocritical care intensivist will necessarily have to tolerate and manage higher reintubation rates than those seen in a general ICU population.

### Competing Interests

The authors declare no competing interests.

**Johann Patlak, M.D., Shahzad Shaefi, M.D., Lauren Buhl, M.D., Ph.D., Myles D. Boone, M.D.** Beth Israel Deaconess Medical Center, Boston, Massachusetts (J.P.). jpatlak@bidmc.harvard.edu

### References

1. Asehnoune K, Seguin P, Lasocki S, Roquilly A, Delater A, Gros A, Denou F, Mahé PJ, Nesseler N, Demeure-Dit-Latte D,

Launey Y, Lakhal K, Rozec B, Mallédant Y, Sébille V, Jaber S, Le Thuaud A, Feuillet F, Cinotti R; ATLANREA group: Extubation success prediction in a multicentric cohort of patients with severe brain injury. *ANESTHESIOLOGY* 2017; 127:338–46

2. Ko R, Ramos L, Chalela JA: Conventional weaning parameters do not predict extubation failure in neurocritical care patients. *Neurocrit Care* 2009; 10:269–73
3. Godet T, Chabanne R, Marin J, Kauffmann S, Futier E, Pereira B, Constantin JM: Extubation failure in brain-injured patients: Risk factors and development of a prediction score in a preliminary prospective cohort study. *ANESTHESIOLOGY* 2017; 126:104–14
4. Yang KL, Tobin MJ: A prospective study of indexes predicting the outcome of trials of weaning from mechanical ventilation. *N Engl J Med* 1991; 324:1445–50
5. Rishi MA, Kashyap R, Wilson G, Schenck L, Hocker S: Association of extubation failure and functional outcomes in patients with acute neurologic illness. *Neurocrit Care* 2016; 24:217–25

(Accepted for publication December 7, 2017.)

#### *In Reply:*

We gratefully acknowledge Dr. Patlak *et al.* for his constructive comments on our article.<sup>1</sup> We fully agree with our colleague when he states that protracted ventilation is the main issue in brain-injured patients,<sup>2</sup> because delaying extubation promotes morbidity and healthcare costs. The VISAGE (visual pursuit, swallowing, age, Glasgow coma scale for extubation) score<sup>1</sup> was developed to help the physician in securing the challenging extubation process in neurocritical care patients. The fear of extubation failure is due to the lack of guidelines for extubation in neurologic patients, and there is a clear need for new clinical evidence to help the attending physician. If the VISAGE score performs well at predicting extubation success based on favorable neurologic clinical signs, it is true that its performance is less accurate in patients with a low score. One obvious explanation stems from the fact that neurologic examination varies considerably within the same day in a single patient. Thus, the VISAGE score, as well as the other prediction score recently published in *ANESTHESIOLOGY*,<sup>3</sup> add a lot to the field by showing for the first time that a suboptimal level of consciousness and one or

two functional aspects of the airway may predict a successful extubation. However, as mentioned by Patlak *et al.*, we need other information for guiding extubation when the value of the VISAGE score is low. Finally, we truly believe that this score is a first step toward improvement of global respiratory management of neurocritical care patients.<sup>4</sup> Even if it is likely that extubation failure rate, as well as delayed extubation, will remain elevated in these patients over the next few years, this should not be considered a fatal flaw.

#### Competing Interests

The authors declare no competing interests.

**Raphaël Cinotti, M.D., Ph.D., Antoine Roquilly, M.D., Ph.D., Karim Asehnoune, M.D., Ph.D.** University Hospital of Nantes, Nantes, France (K.A.). karim.asehnoune@chu-nantes.fr

#### References

1. Asehnoune K, Seguin P, Lasocki S, Roquilly A, Delater A, Gros A, Denou F, Mahé PJ, Nessler N, Demeure-Dit-Latte D, Launey Y, Lakhal K, Rozec B, Mallédant Y, Sébille V, Jaber S, Le Thuaud A, Feuillet F, Cinotti R; ATLANREA Group: Extubation success prediction in a multicentric cohort of patients with severe brain injury. *ANESTHESIOLOGY* 2017; 127:338–46
2. Coplin WM, Pierson DJ, Cooley KD, Newell DW, Rubenfeld GD: Implications of extubation delay in brain-injured patients meeting standard weaning criteria. *Am J Respir Crit Care Med* 2000; 161:1530–6
3. Godet T, Chabanne R, Marin J, Kauffmann S, Futier E, Pereira B, Constantin JM: Extubation failure in brain-injured patients: Risk factors and development of a prediction score in a preliminary prospective cohort study. *ANESTHESIOLOGY* 2017; 126:104–14
4. The BI-VILI Study Group, Asehnoune K, Mrozek S, Perrigault P-F, Seguin P, Dahyot-Fizelier C, Lasocki S, Pujol A, Martin M, Chabanne R, Muller L, Hanouz J-L, Hammad E, Rozec B, Kerforne T, Ichai C, Cinotti R, Geeraerts T, Elaroussi D, Pelosi P, Jaber S, Dalichampt M, Feuillet F, Sébille V, Roquilly A: A multi-faceted strategy to reduce ventilation-associated mortality in brain-injured patients. The BI-VILI project: A nationwide quality improvement project. *Intensive Care Medicine* 2017; 287:345–14

(Accepted for publication December 7, 2017.)
